# Supplementary material for: High prevalence of oncogenic MYD88 and CD79B mutations in diffuse large B-cell lymphomas presenting at immune-privileged sites
Source: PubMed Central journal article supplement — Blood Cancer J. 2013 Sep 6;3(9):e139–. doi: 10.1038/bcj.2013.28 (PMC3789201; doi:10.1038/bcj.2013.28), 2013-09-06
Supplement: bcj201328x2.pdf [file bcj201328x2.pdf]

## Supplementary figure legend

**Figure 1. Sensitivity of allele specific PCRs.** Serial dilution of DNA of the DLBCL cell line LY10 containing a mono-allelic *MYD88* L265P mutation in DNA derived from normal tonsil tissue. 100% corresponds to 100ng/μl LY10 DNA, 0% corresponds with 100ng/μl tonsil DNA. The section with *MYD88* WT primers was run on the same gel.
