# Supplementary figures and images for: High prevalence of oncogenic MYD88 and CD79B mutations in diffuse large B-cell lymphomas presenting at immune-privileged sites
Source: PubMed Central journal article supplement — Blood Cancer J. 2013 Sep 6;3(9):e139–. doi: 10.1038/bcj.2013.28 (PMC3789201; doi:10.1038/bcj.2013.28), 2013-09-06

Supplementary Figure 1

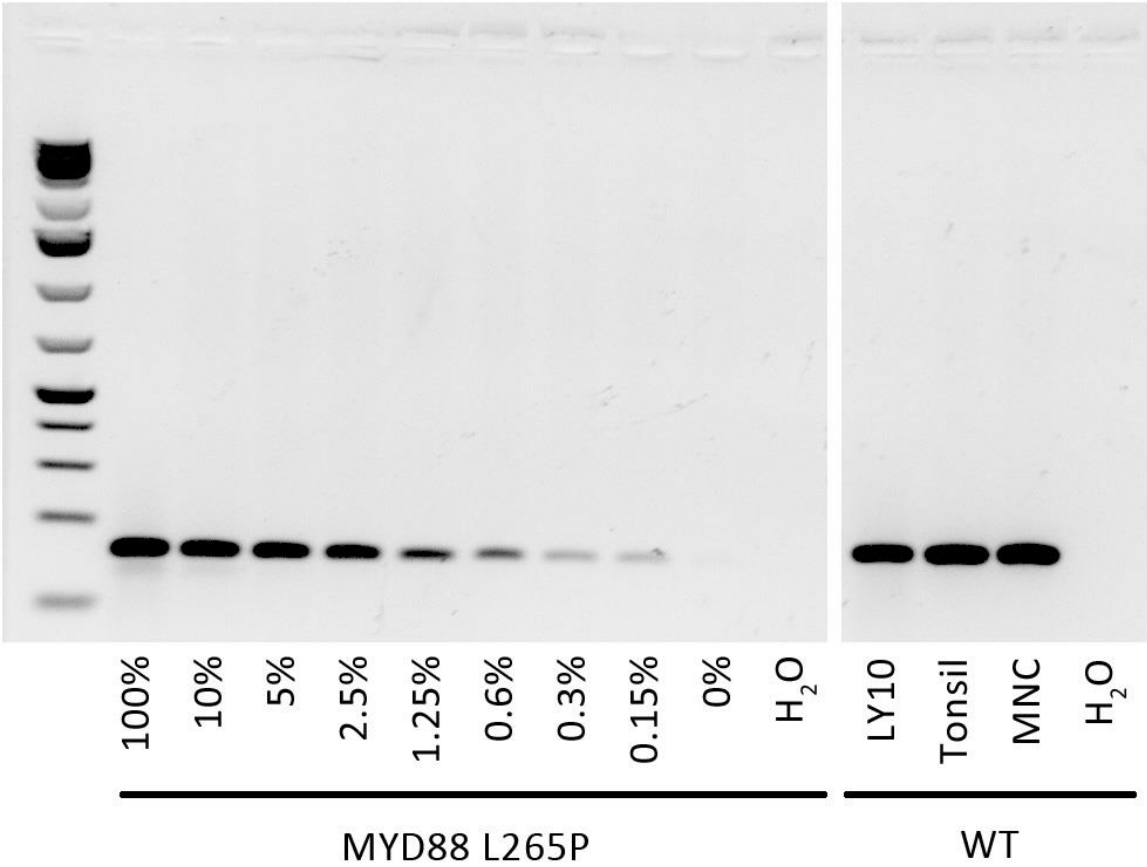

Supplement: bcj201328x1.pdf [file bcj201328x1.pdf]
